# Supplementary material for: Sexual Differences in Physiological and Transcriptional Responses to Salinity Stress of Salix linearistipularis
Source: Front Plant Sci. 2020 Oct 19;11:517962. doi: 10.3389/fpls.2020.517962 (PMC7604296; doi:10.3389/fpls.2020.517962)
Supplement: Supplementary file 4 [file Table_1.XLSX]

## Sheet: Sheet1
Tbale S1. List of qPCR primers
Primer name	sequence (5'-3')
SlU43275-qF	GTCTTATGCGTGGTGCTGTTTC
SlU43275-qR	GACTGTGTGAGAAGGGGTGCT
SlCL7345-qF	ATGGGGAGTGCGATAGAAAA
SlCL7345-qR	CAATGCCGATGACGAGAAGA
SlCL3276-qF	TGGTTTGAGGATGGTATCGGAG
SlCL3276-qR	CAATGGCAAGGGCAGTAGTAGA
SlCL9910-qF	ACCTGGCATAATGTGACTGAGA
SlCL9910-qR	TTCCAACCATAACAAGACCCAG
SlCL2217-qF	CAGGAAAGGAGCAGCAAGCA
SlCL2217-qR	TGACCAAGGACGAAGGAGAGG
